# Supplementary material for: CIBZ Regulates Mesodermal and Cardiac Differentiation of by Suppressing T and Mesp1 Expression in Mouse Embryonic Stem Cells
Source: PubMed Central journal article supplement (PMC5034229; doi:10.1038/srep34188), 2016-09-23
Supplement: srep34188-s1.pdf [file srep34188-s1.pdf]

## **CIBZ Regulates Mesodermal and Cardiac Differentiation of by Suppressing T and Mesp1 Expression in Mouse Embryonic Stem Cells**

Tomomi Kotoku<sup>1</sup>, Koji Kosaka<sup>2</sup>, Miki Nishio<sup>3</sup>, Yasumasa Ishida<sup>3</sup>, Masashi Kawaichi<sup>2</sup> and Eishou Matsuda<sup>2,\*</sup>

### **Supplementary Supporting Information**

**Supplementary Methods**

**Supplementary Figure Legends**

**Supplementary Figures**

**Supplementary tables**

**Supplementary video legends**

## **Supplementary Methods**

### **siRNA and Transient Transfection**

Mouse ESCs were transfected with 50-nM CIBZ-specific or scrambled negative control dicer substrate siRNA duplexes (Integrated DNA Technologies) as described previously<sup>18</sup>. Transfection with siRNA was performed using INTERFERin reagent (Polyplus Transfection) according to the manufacturer's instructions. Subsequently, siRNA-transfected cells were cultured for 3 days and were then cultured under rotary suspension conditions for an additional 2 days.

### **Chromatin Immunoprecipitation (ChIP) Assays**

ChIP assays were performed as described previously<sup>17</sup>. Amplification of immunoprecipitated DNA was achieved using Blend Tag plus DNA polymerase (Toyobo), after annealing primers (Table S3) for promoter regions (prom) and distal regions (dist) at 55°C. All experiments were repeated three times.

### Supplementary Figure Legends

S1. Expression of Nanog, Oct3/4, and Sox2 in WT and CIBZ<sup>-/-</sup> ESCs during ESC differentiation; mRNA levels of the indicated genes were determined using semi-quantitative PCR with GAPDH as a loading control.

S2. Knockdown of CIBZ in ESCs upregulates T and Mesp1 during ESC differentiation; siRNA duplexes were used to reduce CIBZ expression in ESCs. Three days after transfection with 50-nM CIBZ siRNA or 50-nM scrambled negative siRNA (control), ESCs were cultured under rotary suspension conditions for an additional 2 days (day 5), and expression of the indicated genes was determined using semi-quantitative qPCR with GAPDH as a loading control.

S3. CIBZ overexpression in ESCs suppresses cardiac genes during ESC differentiation; mRNA levels of the indicated genes were determined using semi-quantitative qPCR with GAPDH as a loading control.

S4. CIBZ binds to the Mesp1 promoter region but fails to bind to promoter regions of Flk1, Nkx2.5, and Gata4 genes in ESCs; ChIP assays were performed using an anti-CIBZ antibody in undifferentiated ESCs. Non-specific IgG was used as a negative control. Input DNA (1%), IgG-precipitated DNA, and CIBZ-immunoprecipitated DNA were amplified using primers for the indicated promoter regions.

S5. Western blotting analysis of Nanog, Oct3/4, and Sox2 expression during ESC differentiation; Expression levels of the indicated proteins in WT and CIBZ<sup>-/-</sup> ESCs (a), and in pEF1 $\alpha$  (control) and pEF1 $\alpha$ -CIBZ (CIBZ OE) transfected ESCs (b);  $\alpha$ -tubulin was used as a loading control.

S6. Treatment of ESCs with 5-aza-dC failed to abolish binding of CIBZ to T and Mesp1 promoter regions:

**(a)**, Effects of 5-aza-dC treatment on ESCs; ESCs were treated with 5-aza-dC (0.25  $\mu$ M or 0.5  $\mu$ M) for 24 hours and expression of indicated genes and proteins was determined using semi-quantitative PCR (left panel) and Western blotting (right panel) with  $\beta$ -actin and  $\alpha$ -tubulin as loading controls, respectively; **(b)**, Schematic representation of 5' regions of T and Mesp1 promoters (BLAT search genome, UCSC Genome Bioinformatics); Dist, distal; Prom, promoter; **(c)**, ChIP assays were performed using an anti-CIBZ antibody in untreated (upper panel) and 5-aza-dC (0.25  $\mu$ M) treated ESCs (lower panel). Input DNA (2.5%), IgG-precipitated DNA, and CIBZ-immunoprecipitated DNA were amplified using indicated primers for T (left panel) and Mesp1 (right panel).

S7. MG132 treatments of ESCs failed to rescue CIBZ protein expression. ESCs (denoted as EB d0) were trypsinized, were treated with MG132 (2 and 5  $\mu$ M) or DMSO or vehicle (“-”), and were then cultured in ES medium on non-adherent Petri dishes on an orbital shaker for 2 days. Expression of indicated proteins was determined using Western blotting with  $\alpha$ -tubulin as a loading control.



Supplementary Fig. S2

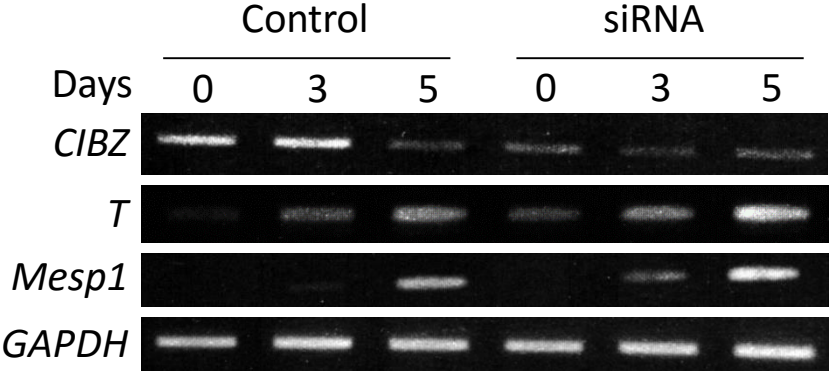



Supplementary Fig. S4

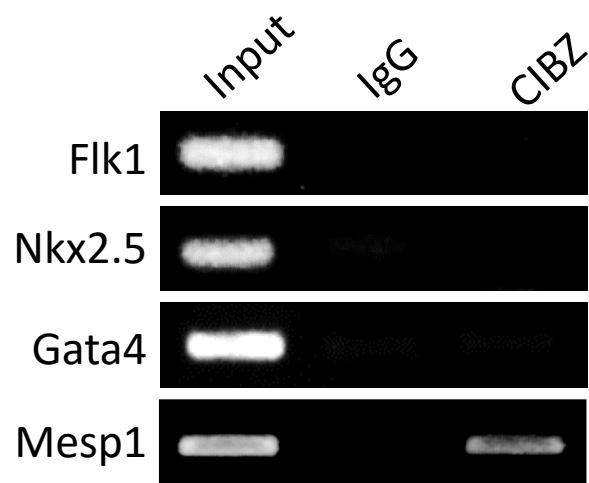









**Table S1. Primer sequences for semi-quantitative RT-PCR**

| Gene          | Primer sequence (5'to 3')                                | Product size |
|---------------|----------------------------------------------------------|--------------|
| <i>Oct3/4</i> | F: TCACTCACATCGCCAATCAG<br>R: CCTGTAGCCTCATACTCTTCTC     | 305 bp       |
| <i>Sox2</i>   | F: CTACAGCATGTCCTACTCGC<br>R: CCTCCAATTCCCTTGTATCTC      | 351 bp       |
| <i>Nanog</i>  | F: TTCAGAAATCCCTTCCCTCG<br>R: AGTAGCAGACCCTTGTAAGC       | 162 bp       |
| <i>Sox1</i>   | F: ATACCGCAATCCCCTCTCAG<br>R: ACAACATCCGACTCCTCTTCC      | 167 bp       |
| <i>Nestin</i> | F: CTGGAAGTGGCTACATACAGGAC<br>R: AGTCTCAAGGGTATTAGGCAAGG | 210 bp       |
| <i>T</i>      | F: GAAGTGAAGGTGGCTGTTGG<br>R: ATTTACCTTCAGCACCGGGA       | 298 bp       |
| <i>Flk1</i>   | F: TCGAGCCCTCATGTCTGAAC<br>R: CACTGAGCGATTTCTCCTCAAC     | 317 bp       |
| <i>Mesp1</i>  | F: GTCTGCAGCGGGGTGTCGTG<br>R: CGGCGGCGTCCAGGTTTCTA       | 189 bp       |
| <i>Gata 6</i> | F: GGGAGAAACTGTGACAATGAC<br>R: ACGAACGCTTGTGAAATGTG      | 166 bp       |
| <i>Sox17</i>  | F: CGAGCCAAAGCGGAGTCTC<br>R: TGCCAAGGTCAACGCCTTC         | 156 bp       |
| <i>Gata 4</i> | F: GTGAGCCTGTATGTAATGCC<br>R: CTGTGCCCATAGTGAGATGAC      | 274 bp       |
| <i>MEF2C</i>  | F: GAGATGCCAGTTACCATCCC<br>R: CTTGTTCAAGTTACCAGGTGAG     | 280 bp       |
| <i>Nkx2.5</i> | F: CCAAGTGCTCTCCTGCTTTCC<br>R: GCCATCCGTCTCGGCTTT        | 149 bp       |
| <i>Tbx5</i>   | F: AGGAGCACAGCCAAATTTACCAC<br>R: ATGAGCGGAGAAGTGCTGGTAG  | 294 bp       |
| <i>Isl1</i>   | F: ATGATGGTGGTTTACAGGCTAA<br>R: TCGATGCTACTTCACTGCCAG    | 174 bp       |
| <i>cTnI</i>   | F: TGCCAACACTACCGAGCCTATG<br>R: TGGCAACGAGTCCTCAGAAC     | 174 bp       |
| <i>GAPDH</i>  | F: CCATCACCATCTTCCAGGAG<br>R: CCTGCTTCACCACCTTCTTG       | 577 bp       |

**Table S2. Primer sequences for qPCR**

| Gene          | Primer sequence (5' to 3')                              | Product size |
|---------------|---------------------------------------------------------|--------------|
| <i>T</i>      | F: GCTTCAAGGAGCTAACTAACGAG<br>R: CCAGCAAGAAAGAGTACATGGC | 117 bp       |
| <i>Flk1</i>   | F: CTGGAGCCTACAAGTGCTCG<br>R: GAGGTTTGAAATCGACCCTCG     | 179 bp       |
| <i>Mesp1</i>  | F: GTCTGCAGCGGGGTGTCGTG<br>R: CGGCGGCGTCCAGGTTTCTA      | 189 bp       |
| <i>Nkx2.5</i> | F: GGTCTCAATGCCTATGGCTAC<br>R: GCCAAAGTTCACGAAGTTGCT    | 153 bp       |
| <i>Gata4</i>  | F: AACGGAAGCCCAAGAACCTG<br>R: AGTGGCATTGCTGGAGTTACC     | 107 bp       |
| <i>Tbx5</i>   | F: AATGGTCCGTAAGTGGCAAAG<br>R: GGATAATGTGTCCAAACGGGTC   | 159 bp       |
| <i>Isl1</i>   | F: ATGATGGTGGTTTACAGGCTAAC<br>R: TCGATGCTACTTCACTGCCAG  | 174 bp       |
| <i>Mef2C</i>  | F: AGGATAATGGATGAGCGTAACAG<br>R: GTTCAATGCCTCCACAATGTC  | 240 bp       |
| <i>cTnI</i>   | F: TGCCAACTACCGAGCCTATG<br>R: TGGCAACGAGTCCTCAGAAC      | 174 bp       |
| <i>MHC</i>    | F: CAGAGGAGAAGGCTGGTGTC<br>R: TTGTCAGCATCTTCTGTGCC      | 121 bp       |
| <i>GAPDH</i>  | F: CAATGTGTCCGTCGTGGATCT<br>R: GTCCTCAGTGTAGCCCAAGATG   | 124 bp       |

**Table S3. Primers for ChIP assay**

|                             | Primer sequence (5' to 3')                                  |
|-----------------------------|-------------------------------------------------------------|
| T<br>(Promoter region)      | F: GCTGCTCGGTACTTCAAAGGG<br>R: GCGCGACAAGAGTAAGTCTCTG       |
| T<br>(Distal region)        | F: TCCTGCTCTTTGTCACCTTC<br>R: GATTGTTGGAACGCATGCTG          |
| Mesp1<br>(Promoter region)  | F: GTGGAGCAGACTGGACTAAG<br>R: TTATCCTGAGCCCTAGGTGTG         |
| Mesp1<br>(Distal region)    | F: ACTCTAGCTGCCTGTCTTGG<br>R: CCTTACTTCACATACCAGAGCCTT      |
| Flk1<br>(Promoter region)   | F: GACTTTCAGTGCAGCGGCGAAG<br>R: CAAATCTGGACGCAGCTCGGTTTC    |
| Gata4<br>(Promoter region)  | F: CGTAGATCTGAGGCTAGCAAGGC<br>R: CTCTTTCCTCCCTACTCTCAGTGGTC |
| Nkx2.5<br>(Promoter region) | F: CTGGCTGGGATTTTCAGGCTAACGAG<br>R: ACGGGCAGTTCTGCGTACCTAAT |

**Table S4. Primers for pGL3-T and pGL-3-Mesp1 constructs**

|       | Primer sequence (5' to 3')                                                      |
|-------|---------------------------------------------------------------------------------|
| T     | F: AGACGACGCGTCAAAGTCGCAGGCGCCGGTGTG<br>R: GTCCCAAGCTTCCACCCTCTCCACCTTCCAG      |
| Mesp1 | F: AGACGACGCGTCAAGGCTCTGGTATGTGAAGTAAGG<br>R: GTCCCAAGCTTGGCAGCGGAGGCCTGACCATTG |

## **Supplementary video legends**

**Supplementary video 1.** Representative video documenting the spontaneous beating of WT EBs at day 10 of ESC differentiation.

**Supplementary video 2.** Representative video documenting the spontaneous beating of CIBZ<sup>-/-</sup> EBs at day 10 of ESC differentiation.
